# Supplementary material for: Stratification of reactivity determines nitrate removal in groundwater
Source: PubMed Central journal article supplement (PMC6377467; doi:10.1073/pnas.1816892116), 2019-01-28
Supplement: pnas.1816892116.sapp.pdf [file pnas.1816892116.sapp.pdf]

# 1 Stratification of reactivity determines nitrate removal in groundwater

2 Tamara Kolbe<sup>a,1,2</sup>, Jean-Raynald de Dreuzy<sup>a,b</sup>, Benjamin W. Abbott<sup>c,d</sup>, Luc Aquilina<sup>a,3</sup>,

3 Tristan Babey<sup>a,3</sup>, Christopher T. Green<sup>e,3</sup>, Jan H. Fleckenstein<sup>f,g,3</sup>, Thierry Labasque<sup>a,3</sup>, Anniet

4 M. Laverman<sup>d,3</sup>, Jean Marçais<sup>h,a,3</sup>, Stefan Peiffer<sup>i,3</sup>, Zahra Thomas<sup>j,3</sup>, Gilles Pinay<sup>d,k</sup>

5 <sup>a</sup>Centre National de la Recherche Scientifique (CNRS), Géoscience Rennes - UMR 6118, Université de Rennes,  
6 35042 Rennes, France;

7 <sup>b</sup>Centre National de la Recherche Scientifique (CNRS), Institut National de la Recherche Agronomique (INRA),  
8 Observatoire des Sciences de l'Univers de Rennes (OSUR) - UMR 3343, Université de Rennes, 35042 Rennes,  
9 France;

10 <sup>c</sup>Department of Plant and Wildlife Sciences, Brigham Young University, Provo, UT 84604;

11 <sup>d</sup>Centre National de la Recherche Scientifique (CNRS), ECOBIO - UMR 6553, Université de Rennes, 35042  
12 Rennes, France;

13 <sup>e</sup>Water Mission Area, US Geological Survey, Menlo Park, CA 94025;

14 <sup>f</sup>Department of Hydrogeology, Helmholtz Centre for Environmental Research – Zentrum für Umweltforschung  
15 (UFZ), 04318 Leipzig, Germany;

16 <sup>g</sup>Division of Hydrologic Modeling, University of Bayreuth, 95447 Bayreuth, Germany;

17 <sup>h</sup>Ecole nationale du génie rural, des eaux et des forêts (ENGREF), Agroparistech, 75231 Paris, France;

18 <sup>i</sup>Department of Hydrology, Bayreuth Center of Ecology and Environmental Research, 95447 Bayreuth, Germany;

19 <sup>j</sup>Institut National de la Recherche Agronomique (INRA), Sol Agro et Hydrosystème Spatialisation, UMR 1069,  
20 Agrocampus Ouest, 35042 Rennes, France; and

21 <sup>k</sup>Institut National de Recherche en Sciences et Technologies pour l'Environnement et l'Agriculture (Irstea),  
22 RiverLy, Centre de Lyon-Villeurbanne, 69625 Villeurbanne, France

23  
24 <sup>2</sup>Present address: Department of Aquatic Sciences and Assessment, Swedish University of Agricultural Sciences,  
25 75007 Uppsala, Sweden

26 <sup>3</sup>Authors contributed equally to this work.

27 *Classification: PHYSICAL SCIENCE, Environmental Science*

28 *Keywords: groundwater, denitrification, reactivity patterns, transit times, reaction times*

<sup>1</sup> To whom correspondence may be addressed. Email: Tamara.Kolbe@posteo.net

29 **S1 Information about the crystalline unconfined aquifer Pleine-Fougères, France**30 **S1.1 Field data**

31 *Table S1: CFC-12, O<sub>2</sub>, NO<sub>3</sub><sup>-</sup> and NO<sub>3</sub><sup>-</sup> degraded concentrations for each sampling campaign (Dec 2014, Mar 2015*  
 32 *and Oct 2015)*

| ID | CFC-12 [pptv] |        |        | O <sub>2</sub> [mg/L] |        |        | NO <sub>3</sub> <sup>-</sup> [mg/L] |        |        | NO <sub>3</sub> <sup>-</sup> degraded* [mg/L] |        |        |
|----|---------------|--------|--------|-----------------------|--------|--------|-------------------------------------|--------|--------|-----------------------------------------------|--------|--------|
|    | Dec-14        | Mar-15 | Oct-15 | Dec-14                | Mar-15 | Oct-15 | Dec-14                              | Mar-15 | Oct-15 | Dec-14                                        | Mar-15 | Oct-15 |
| 1  | 397.94        | 251.65 | 337.34 | 0.16                  | 0.07   | 0.54   | 23.56                               | 26.06  | 26.57  | 41.44                                         | 32.76  | 32.73  |
| 2  | 377.06        | 263.35 | 313.38 | 0.44                  | 0.39   | 0.16   | 0.00                                | 0.00   | 0.09   | 10.44                                         | 9.96   | 8.82   |
| 3  | 521.38        | 329.29 | 460.82 | 5.05                  | 6.18   | 6.36   | 51.84                               | 48.98  | 50.32  | 12.34                                         | 12.63  | 2.87   |
| 4  | 192.67        | 107.23 | 141.06 | 2.18                  | 1.45   | 0.71   | 0.33                                | 0.12   | 0.00   | 23.87                                         | 35.57  | 37.88  |
| 5  | -             | 227.51 | 242.92 | 2.39                  | 2.60   | 1.63   | 26.34                               | 33.53  | 22.78  | 29.12                                         | 22.97  | 40.43  |
| 6  | 188.08        | 73.24  | 108.97 | 1.54                  | 1.15   | 1.70   | 37.76                               | 37.77  | 37.70  | 27.58                                         | 30.34  | 27.69  |
| 7  | -             | 98.51  | 99.91  | -                     | 0.32   | 0.29   | -                                   | 0.00   | 0.00   | -                                             | 52.97  | 46.64  |
| 8  | 437.05        | 261.75 | 410.69 | 6.24                  | 5.59   | 5.32   | 63.63                               | 63.57  | 68.19  | 19.42                                         | 17.13  | 16.52  |
| 9  | 36.08         | 36.49  | 33.63  | 0.10                  | 0.41   | 0.20   | 0.00                                | 0.00   | 0.00   | 19.25                                         | 17.81  | 17.54  |
| 10 | 464.76        | 91.75  | 33.14  | 4.16                  | 3.94   | 0.88   | 0.00                                | 0.00   | 0.00   | 14.17                                         | 2.06   | 7.13   |
| 11 | 11.08         | 36.36  | 29.83  | 0.15                  | 0.85   | 0.04   | 0.00                                | 0.00   | 0.00   | 10.55                                         | 10.20  | 15.83  |
| 12 | 82.14         | 126.68 | 103.18 | 0.24                  | 1.30   | 1.60   | 0.00                                | 0.00   | 0.04   | 36.72                                         | 44.55  | 37.18  |
| 13 | 134.58        | 125.20 | 95.75  | 1.56                  | 1.18   | 0.78   | 37.96                               | 38.78  | 24.04  | 19.52                                         | 19.04  | 19.71  |
| 14 | 435.60        | 254.18 | 480.63 | 6.76                  | 6.78   | 7.20   | 42.60                               | 52.37  | 39.08  | 2.03                                          | 4.11   | 0.00   |
| 15 | 933.77        | -      | 746.32 | 2.87                  | 3.88   | 2.39   | 32.04                               | 61.81  | 32.70  | 11.82                                         | 11.45  | 12.48  |
| 16 | -             | -      | 220.00 | -                     | -      | 7.66   | -                                   | -      | 75.02  | -                                             | -      | 0.00   |

33 \* calculated from dissolved N<sub>2</sub>

34

35 **S1.2 Well locations with information about  $\tau_{stratum}$  and  $\tau_{enter}$**

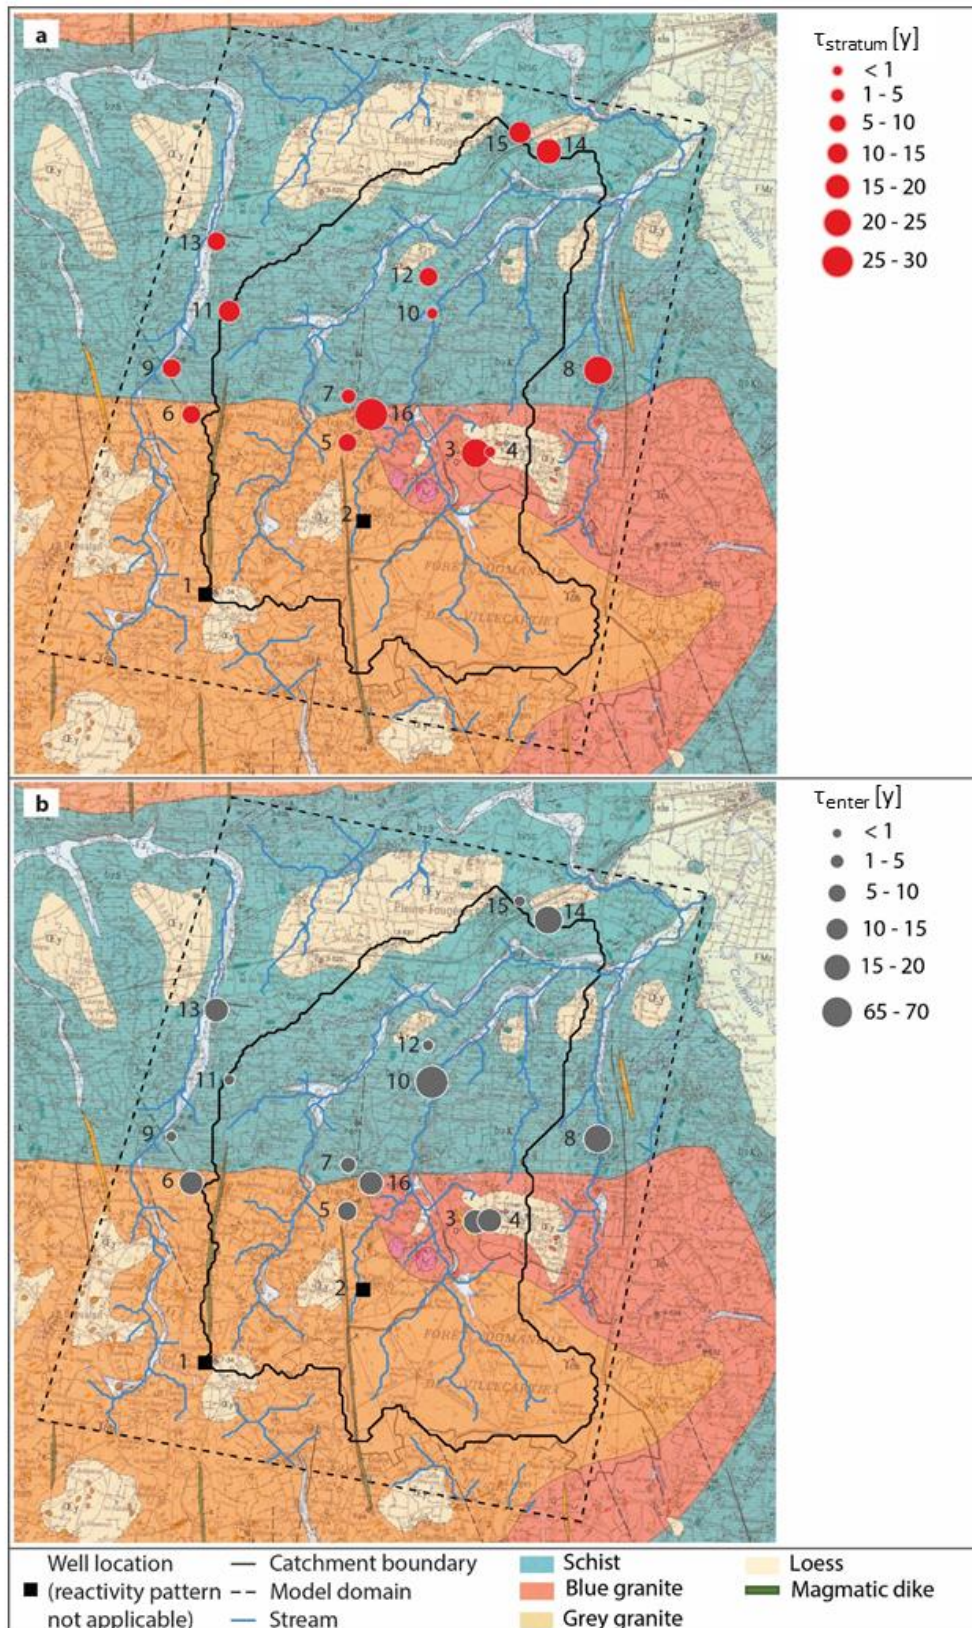

36

37 Fig. S1.2: **a**, represents  $\tau_{stratum}$  and **b**, represents  $\tau_{enter}$  for each well location at the Pleine-Fougères site, France.

38 **S1.3 Correlation of apparent reaction times with hydrological conditions**39 *Tab. S1.3-1: Hydrological conditions at well locations*

| ID | Well depth [m] | Water table depth [m] | Thickness saturated zone [m] | CFC based groundwater age [y] | Mean travel distance [m] |
|----|----------------|-----------------------|------------------------------|-------------------------------|--------------------------|
| 1  | 65             | 6.4                   | 58.6                         | 34                            | 173                      |
| 2  | 70             | 2.4                   | 67.6                         | 43                            | 436                      |
| 3  | 34             | 11.7                  | 20.3                         | 15                            | 176                      |
| 4  | 82             | 16.3                  | 65.7                         | 45                            | 403                      |
| 5  | 94             | 11.9                  | 82.1                         | 30                            | 422                      |
| 6  | 60             | 20.1                  | 39.9                         | 32                            | 393                      |
| 7  | 98             | 22.7                  | 75.3                         | 43                            | 600                      |
| 8  | 80             | 7.2                   | 75.8                         | 49                            | 765                      |
| 9  | 58             | 1.7                   | 56.3                         | 45                            | 868                      |
| 10 | 46             | 0.1                   | 46                           | 62                            | 1029                     |
| 11 | 84             | 2.4                   | 81.6                         | 40                            | 66                       |
| 12 | 34             | 4.6                   | 29.4                         | 23                            | 173                      |
| 13 | 30             | 1.2                   | 28.8                         | 27                            | 271                      |
| 14 | 66             | 8.3                   | 57.7                         | 21                            | 199                      |
| 15 | 28             | 3.7                   | 24.3                         | 8                             | 122                      |
| 16 | 35             | 20.1                  | 14.9                         | 16                            | 183                      |

40

41 *Tab. S1.3-2: Pearson product-moment correlation between well characteristics and apparent reaction times*

|                           | $\tau_{O_2,app}$ | $\tau_{NO_3^-,app}$ |
|---------------------------|------------------|---------------------|
| Well depth                | -0.31            | 0.01                |
| Water table depth         | 0.04             | -0.45               |
| Thickness saturated zone  | -0.33            | 0.15                |
| CFC based groundwater age | -0.08            | 0.05                |
| Mean travel distance      | 0.17             | -0.24               |

42

## 43 **S2 Concentrations within the apparent and strata framework – synthetic test case**

44 Here, a uniform transit time distribution and constant input concentrations are used to illustrate  
 45 the relations between  $O_2$  and  $NO_3^-$  concentrations, the stratum reaction times  $\tau_{stratum}$  and the  
 46 apparent reaction times  $\tau_{app}$ . The uniform transit time distribution is defined between  $t_{min} = 0$  y  
 47 and  $t_{max} = 70$  y.  $O_2$  and  $NO_3^-$  input concentrations are constant over time, e.g.  $[O_2]_0 = 7$  mg/L  
 48 and  $[NO_3^-]_0 = 28$  mg/L. Relations between apparent and stratum reaction times derive from the  
 49 equality of apparent and strata concentrations:

$$[O_2]_{app} = [O_2]_{stratum} \quad [S1]$$

$$[NO_3^-]_{app} = [NO_3^-]_{stratum} \quad [S2]$$

### 50 **S2.1 Concentrations within the apparent framework**

51 Apparent concentrations  $[O_2]_{app}$  and  $[NO_3^-]_{app}$  in a well are calculated by convoluting their  
 52 input concentrations  $[O_2]_0(t)$  and  $[NO_3^-]_0(t)$  with the transit time distribution  $p(t)$  and  
 53 applying a first-order reaction term using Eq. S3 and S4. Reactions are assumed to occur  
 54 uniformly along the flow line. Expressions are given hereafter in cases where both,  $O_2$  and  $NO_3^-$   
 55 concentrations, are fully degraded within the range of the transit time distribution, i.e. when the  
 56 critical time  $t_{c,app} = -\tau_{app} \ln\left(\frac{[O_2]_c}{[O_2]_0}\right)$  is within the limits of the time distribution ( $t_{min} <$   
 57  $t_{app,c} < t_{max}$ ):

$$[O_2]_{app} = [O_2]_0 \frac{\tau_{O_2,app} \left( e^{-\frac{t_{min}}{\tau_{O_2,app}}} - e^{-\frac{t_{max}}{\tau_{O_2,app}}} \right)}{t_{max} - t_{min}} \quad [S3]$$

$$[\text{NO}_3^-]_{app} = [\text{NO}_3^-]_0 \frac{\tau_{\text{NO}_3^-,app} \left( 1 - e^{-\frac{t_{max}-t_{c,app}}{\tau_{\text{NO}_3^-,app}}} \right) - t_{min} + t_{c,app}}{t_{max} - t_{min}} \quad [\text{S4}]$$

## 58 S2.2 Concentrations in the strata framework – The late start pattern

59 Within the late start pattern, O<sub>2</sub> and NO<sub>3</sub><sup>-</sup> concentrations are calculated by using Eq. S5 and S6.

60 Solutions are given for  $t_{min} < \tau_{enter} + t_{c,stratum} < t_{max}$  with  $t_{c,stratum} =$

61  $-\tau_{stratum} \ln \left( \frac{[\text{O}_2]_c}{[\text{O}_2]_0} \right)$  when both, O<sub>2</sub> and NO<sub>3</sub><sup>-</sup> reduction, can occur and are not complete:

$$[\text{O}_2]_{stratum} = [\text{O}_2]_0 \frac{\tau_{\text{O}_2,stratum} \left( 1 - e^{-\frac{t_{max}-\tau_{enter}}{\tau_{\text{O}_2,stratum}}} \right) + \tau_{enter} - t_{min}}{t_{max} - t_{min}} \quad [\text{S5}]$$

$$[\text{NO}_3^-]_{stratum} = [\text{NO}_3^-]_0 \frac{\tau_{\text{NO}_3^-,stratum} \left( 1 - e^{-\frac{t_{max}-\tau_{enter}-t_{c,stratum}}{\tau_{\text{NO}_3^-,stratum}}} \right) + \tau_{enter} + t_{c,stratum} - t_{min}}{t_{max} - t_{min}} \quad [\text{S6}]$$

## 62 S2.3 Relations between apparent and stratum reaction times – The late start pattern

63 Apparent and stratum reaction times are related to yield identical O<sub>2</sub> and NO<sub>3</sub><sup>-</sup> concentrations

64 using Eq. S.1 and S.2. Observed O<sub>2</sub> and NO<sub>3</sub><sup>-</sup> concentrations can be interpreted within the

65 apparent and strata framework. For example, sampled concentrations  $[\text{O}_2] = 1.5$  mg/L and

66  $[\text{NO}_3^-] = 8.6$  mg/L lead to significantly faster apparent denitrification ( $\tau_{\text{NO}_3^-,stratum} = 2.3$  y)

67 than apparent O<sub>2</sub> reduction ( $\tau_{\text{O}_2,stratum} = 15.2$  y) (Fig. S2.1a). This goes against common

68 ecological sense. The same concentrations interpreted within the strata framework lead to equal

69 stratum reaction time for O<sub>2</sub> and NO<sub>3</sub><sup>-</sup> reduction  $\tau_{stratum} = 5$  y and a delay of the reactions

70  $\tau_{enter} = 10$  y, showing a late start pattern (Fig. S2.1b). Within the strata framework, O<sub>2</sub>

71 reduction starts later and occurs faster than within the apparent framework. NO<sub>3</sub><sup>-</sup> reduction starts

72 earlier and is slower.

73  $\tau_{enter}$  and  $\tau_{stratum}$  can be determined for any couple of  $\tau_{O_2,app}$  and  $\tau_{NO_3^-,app}$  as long as  
 74  $\tau_{O_2,app} > \tau_{NO_3^-,app}$ . Divergences between apparent and stratum reaction times occur when  $\tau_{enter}$   
 75 progressively increases as revealed by differences in reaction times of  $O_2$  and  $NO_3^-$  reduction  
 76 (Fig. S2.2a). Apparent reaction times logically increase with the stratum reaction time (Fig.  
 77 S2.2b).

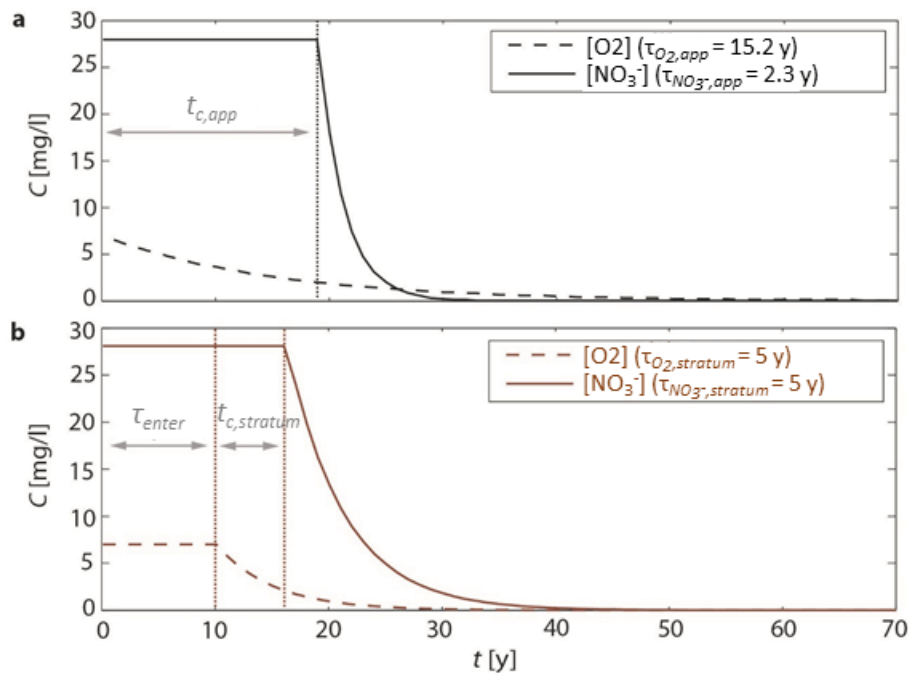

78

79 Fig. S2.1: The evolution of  $O_2$  and  $NO_3^-$  concentrations as functions of transit times for a sampling zone. The transit  
 80 time distribution is uniform. The interpreted concentrations of  $O_2$  and  $NO_3^-$  are equal between **a**, the apparent and  
 81 **b**, the late start pattern.

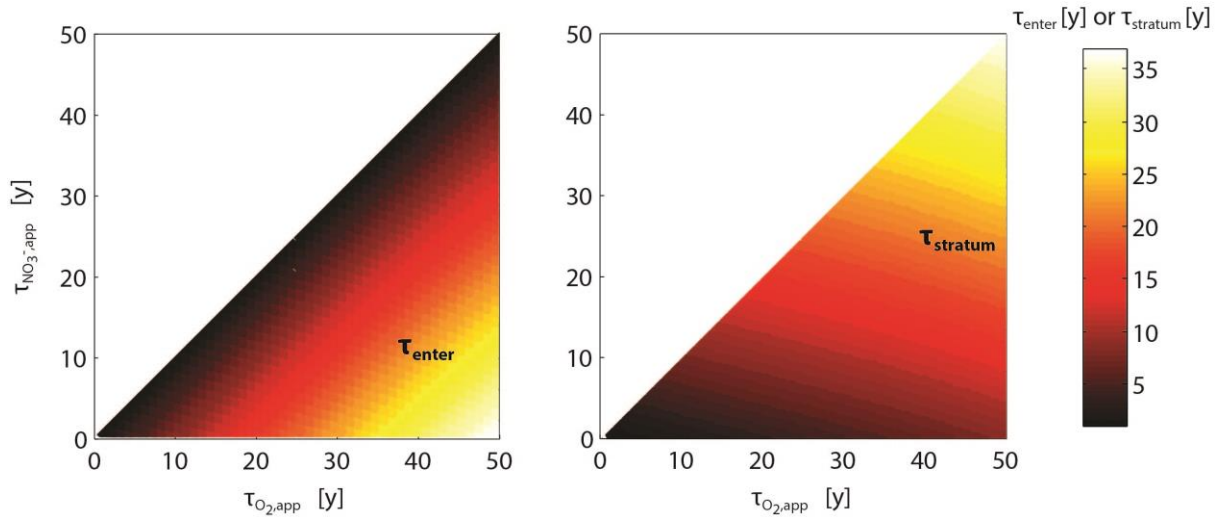

82

83 *Fig. S2.2: a,  $\tau_{\text{enter}}$  and b,  $\tau_{\text{stratum}}$  as functions of apparent reaction times.*84 **S2.4 Concentrations in the strata framework – The early stop pattern**85 Within the early stop pattern, strata  $\text{O}_2$  and  $\text{NO}_3^-$  concentrations are calculated with Eq. S7 and86 S8. Solutions are valid within the integration limits  $t_{\text{min}} < \tau_{\text{leave}} + t_{\text{c,stratum}} < t_{\text{max}}$ .

$$[\text{O}_2]_{\text{stratum}} = [\text{O}_2]_0 \frac{\tau_{\text{O}_2,\text{stratum}} e^{-\frac{t_{\text{min}}}{\tau_{\text{O}_2,\text{stratum}}} + (t_{\text{max}} - \tau_{\text{leave}} - \tau_{\text{O}_2,\text{stratum}}) e^{-\frac{\tau_{\text{leave}}}{\tau_{\text{O}_2,\text{stratum}}}}}{t_{\text{max}} - t_{\text{min}}} \quad [\text{S7}]$$

$$[\text{NO}_3^-]_{\text{stratum}} =$$

$$[\text{NO}_3^-]_0 \frac{\tau_{\text{NO}_3^-, \text{stratum}} + (t_{\text{max}} - \tau_{\text{leave}} - \tau_{\text{NO}_3^-, \text{stratum}}) e^{-\frac{\tau_{\text{leave}} - t_{\text{c,stratum}}}{\tau_{\text{NO}_3^-, \text{stratum}}}} + t_{\text{c,stratum}} - t_{\text{min}}}{t_{\text{max}} - t_{\text{min}}} \quad [\text{S8}]$$

87 **S2.5 Relation between apparent and stratum reaction times – The early stop pattern**88 Larger apparent reaction times for  $\text{NO}_3^-$  than for  $\text{O}_2$  are representative for the early stop pattern89 and show incomplete reactions, which can be interpreted as long as the  $\text{NO}_3^-$  and  $\text{O}_2$  apparent

90 times do not diverge too strongly.



91 Fig. S2.5 demonstrates how  $\tau_{leave}$  and  $\tau_{stratum}$  evolve in the plot of apparent  $O_2$  and  $NO_3^-$   
92 reaction times. With a large time to leave the reactive zone, the relation of apparent reaction  
93 times approaches the 1:1 line, showing a similar pattern as for uniform distributed reactivity  
94 (Fig. S2.5a). Within the early stop pattern, apparent  $O_2$  reaction times are strongly impacted by  
95 stratum reaction times (Fig. S2.5b).

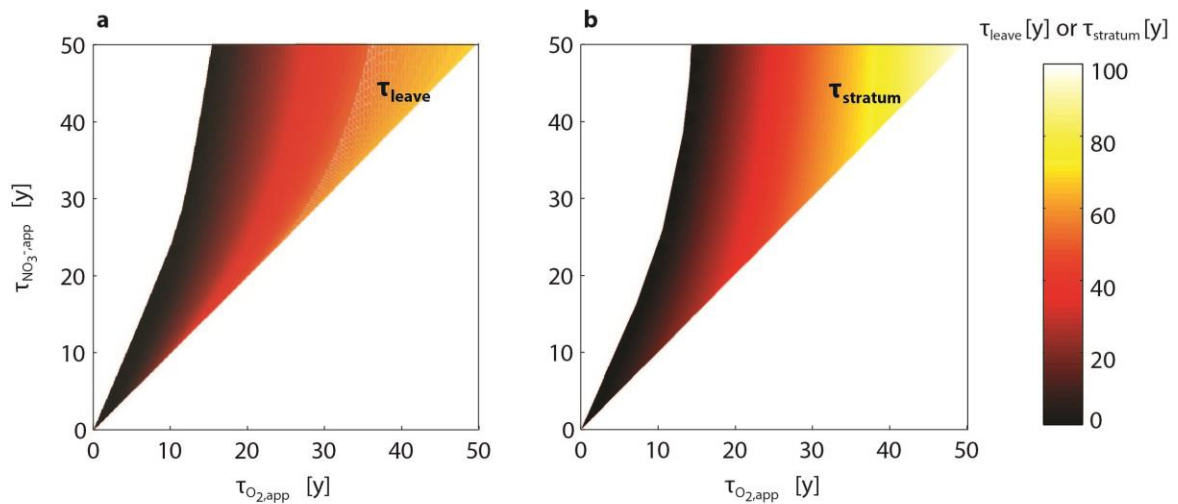

96

97 Fig. S2.5: Evolution of **a**,  $\tau_{leave}$  and **b**,  $\tau_{stratum}$  within the plot of apparent reaction times.
